# Supplementary material for: New domino reaction for the selective synthesis of tetracyclic cinnolino[5,4,3-cde]cinnolines
Source: Royal Society of Chemistry journal article supplement (doi:10.1039/b817930a), 2009-01-01
Supplement: b817930a.pdf [file b817930a.pdf]

# Supporting Information

## New domino reaction for the selective synthesis of tetracyclic cinnolino[5,4,3-*cde*]cinnolines

Bo Jiang, Wen-Juan Hao, Jin-Peng Zhang, Shu-Jiang Tu,\* and Feng Shi

School of Chemistry and Chemical Engineering, Xuzhou Normal University, Xuzhou; College of Chemistry, Chemical Engineering and Materials Science, Suzhou University, Suzhou; and Department of Public Health, Xuzhou Medical College, Xuzhou 221000, P. R. China

laotu@xznu.edu.cn

### Copies of spectra for compounds 2 and 3

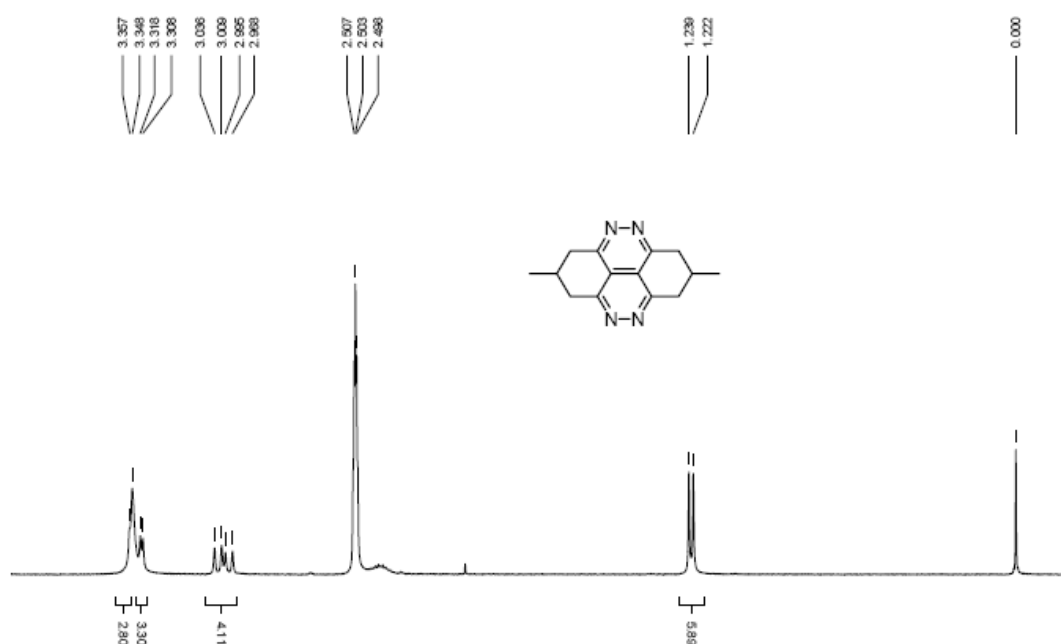

<sup>1</sup>H NMR Spectrum of Compound 2d

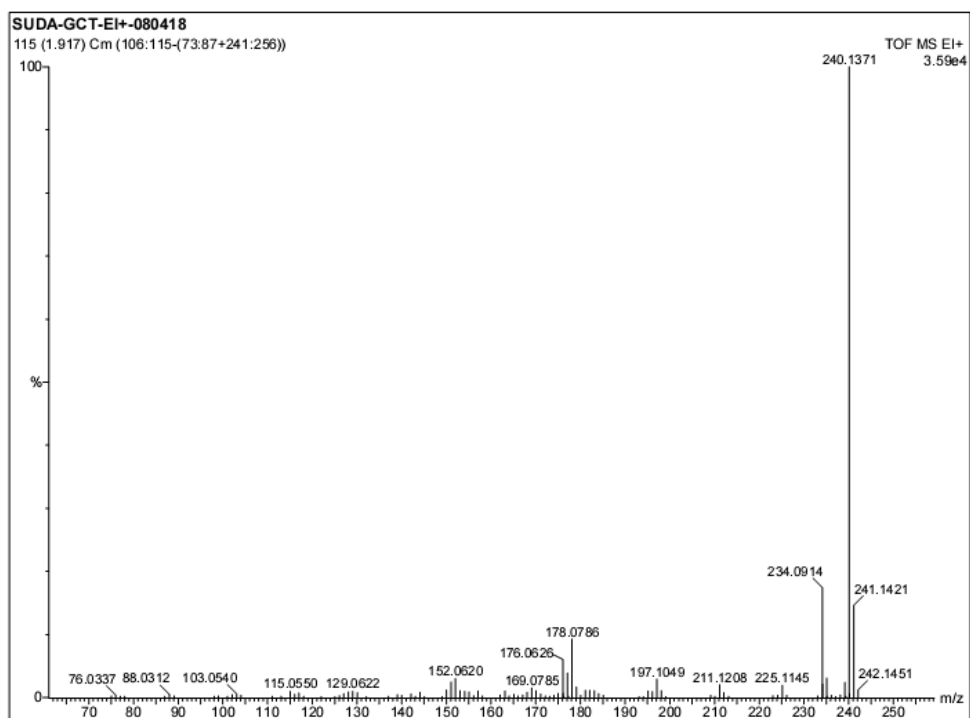

HRMS Spectrum of Compound 2d

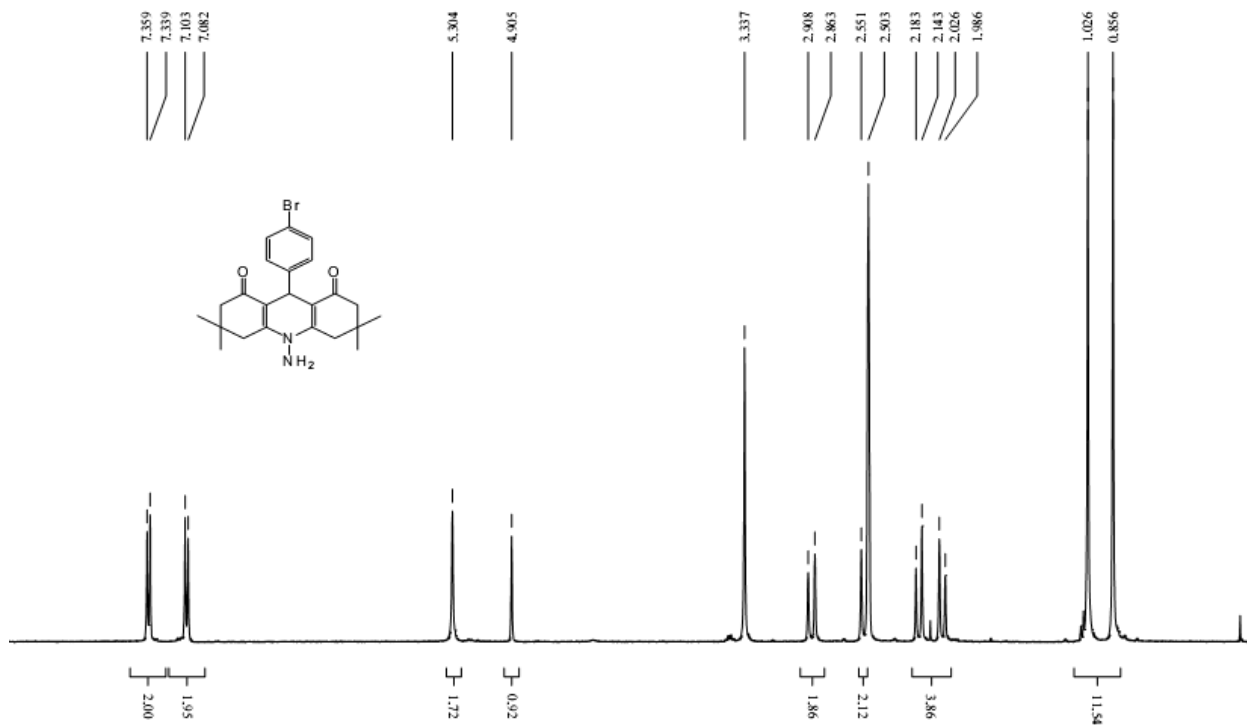

<sup>1</sup>H NMR Spectrum of Compound 3a

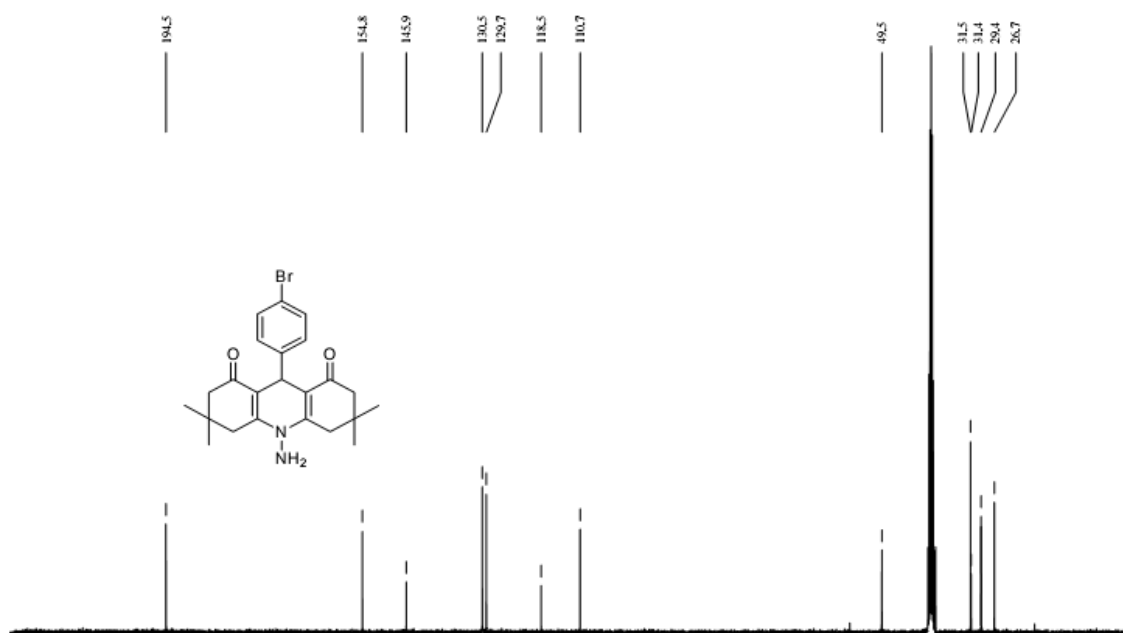

<sup>13</sup>C NMR Spectrum of Compound 3a

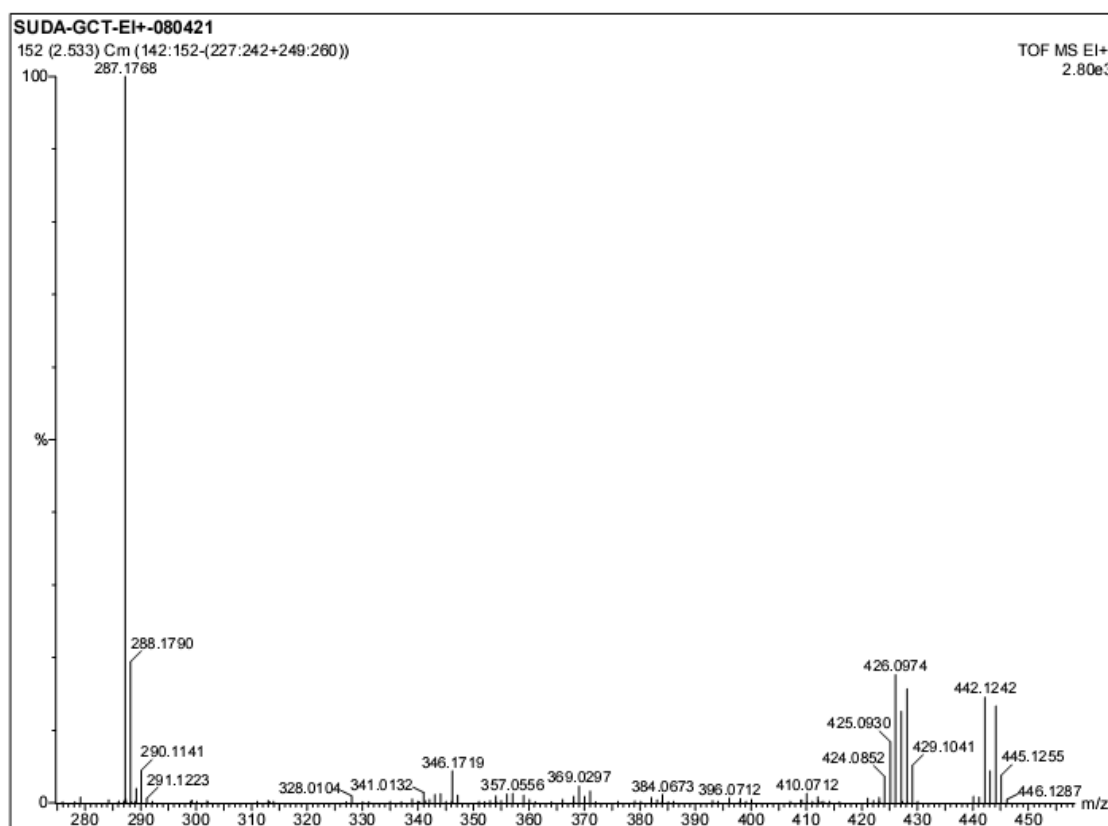

HRMS Spectrum of Compound 3a

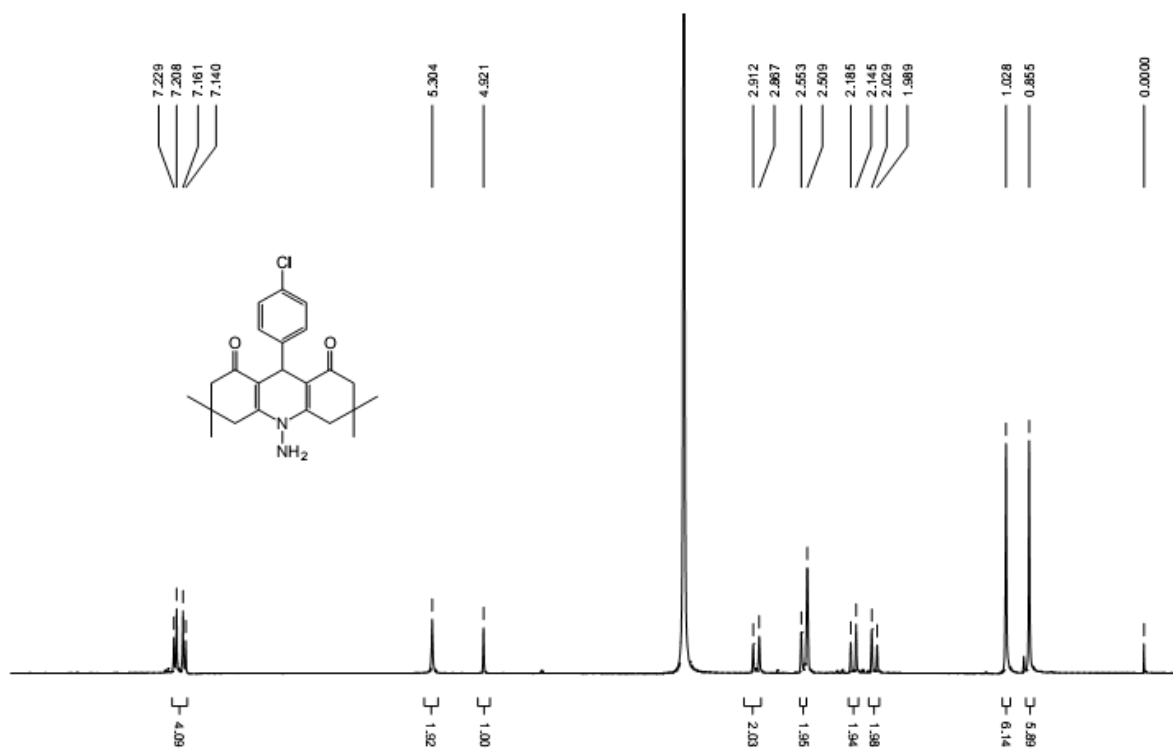

**<sup>1</sup>H NMR Spectrum of Compound 3b**

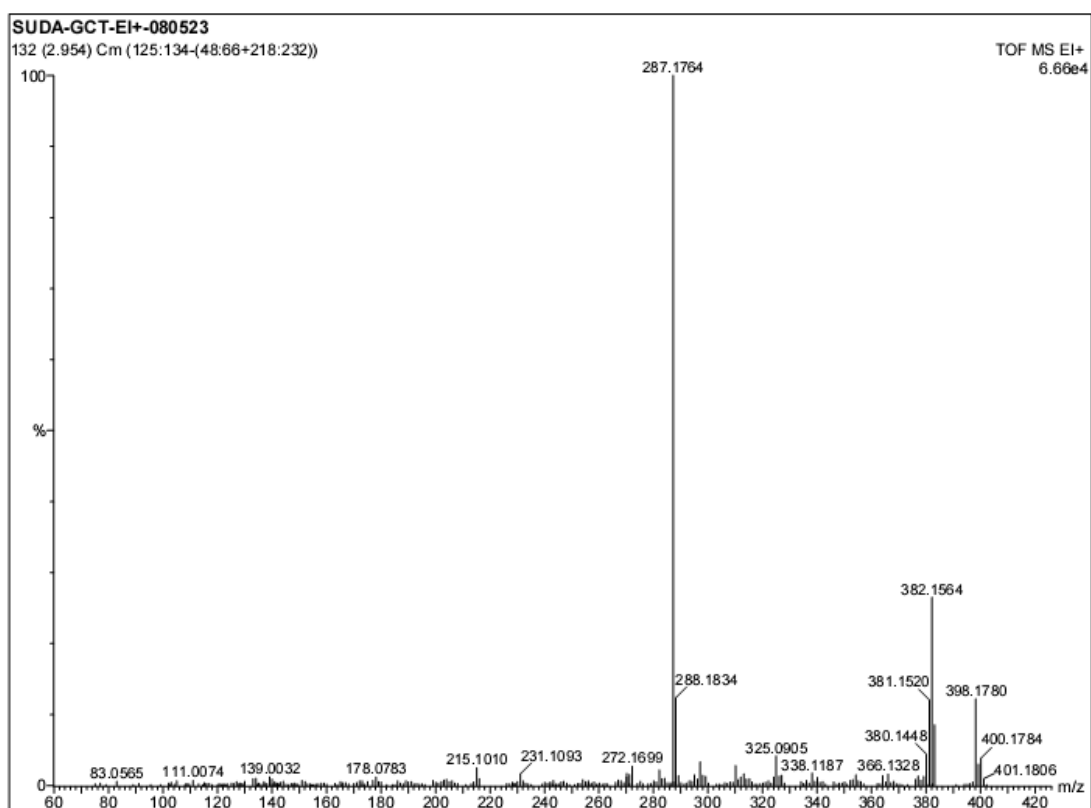

**HRMS Spectrum of Compound 3b**

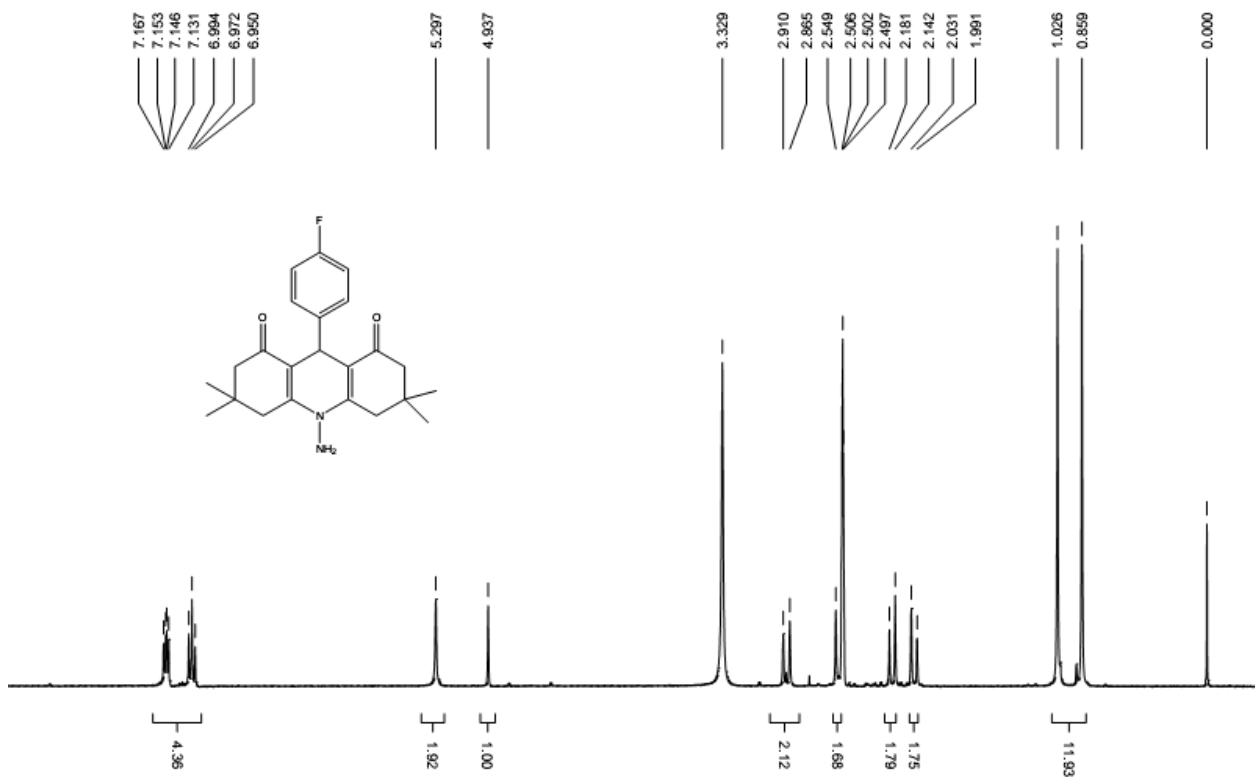

**<sup>1</sup>H NMR Spectrum of Compound 3c**

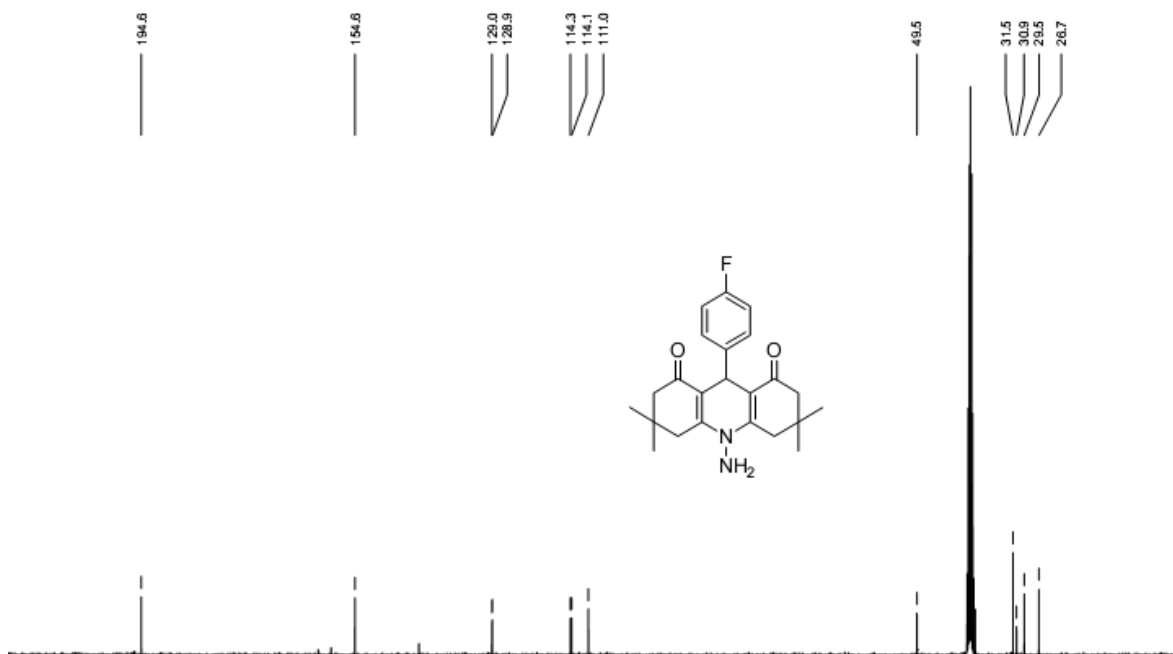

**<sup>13</sup>C NMR Spectrum of Compound 3c**

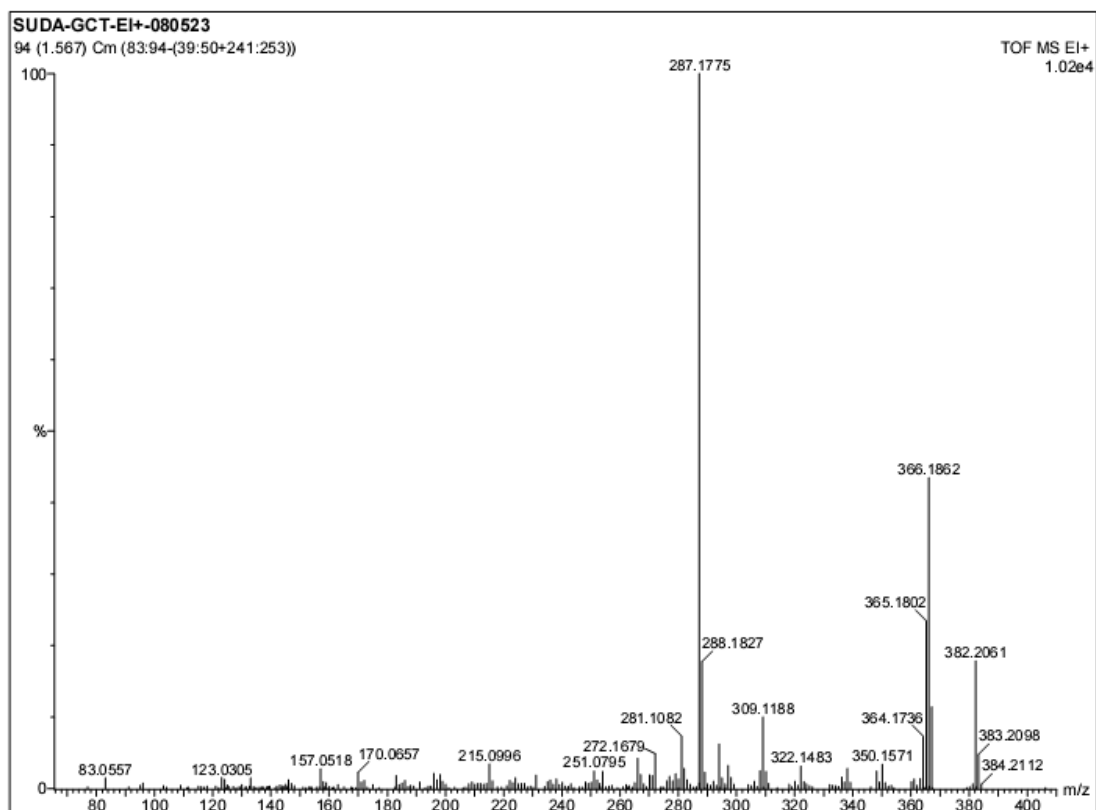

### HRMS Spectrum of Compound 3c

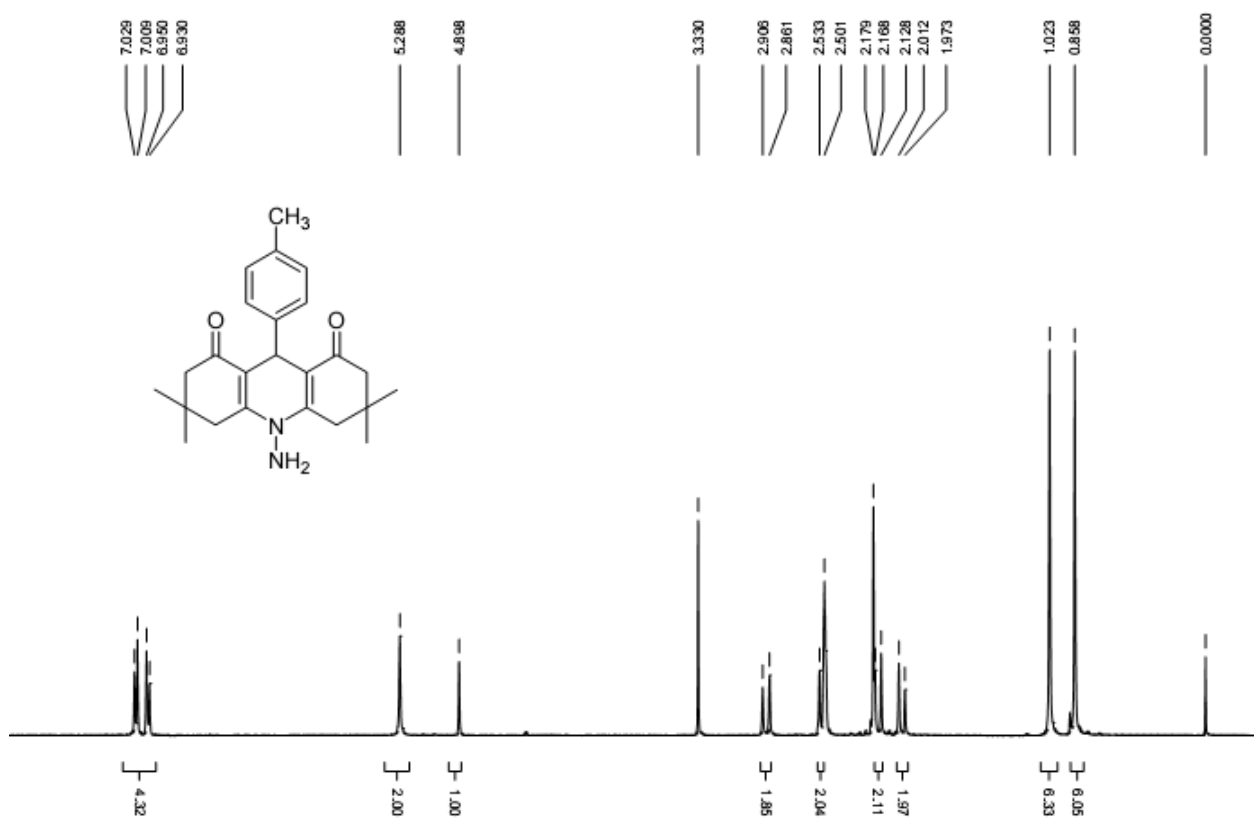

### <sup>1</sup>H NMR Spectrum of Compound 3d

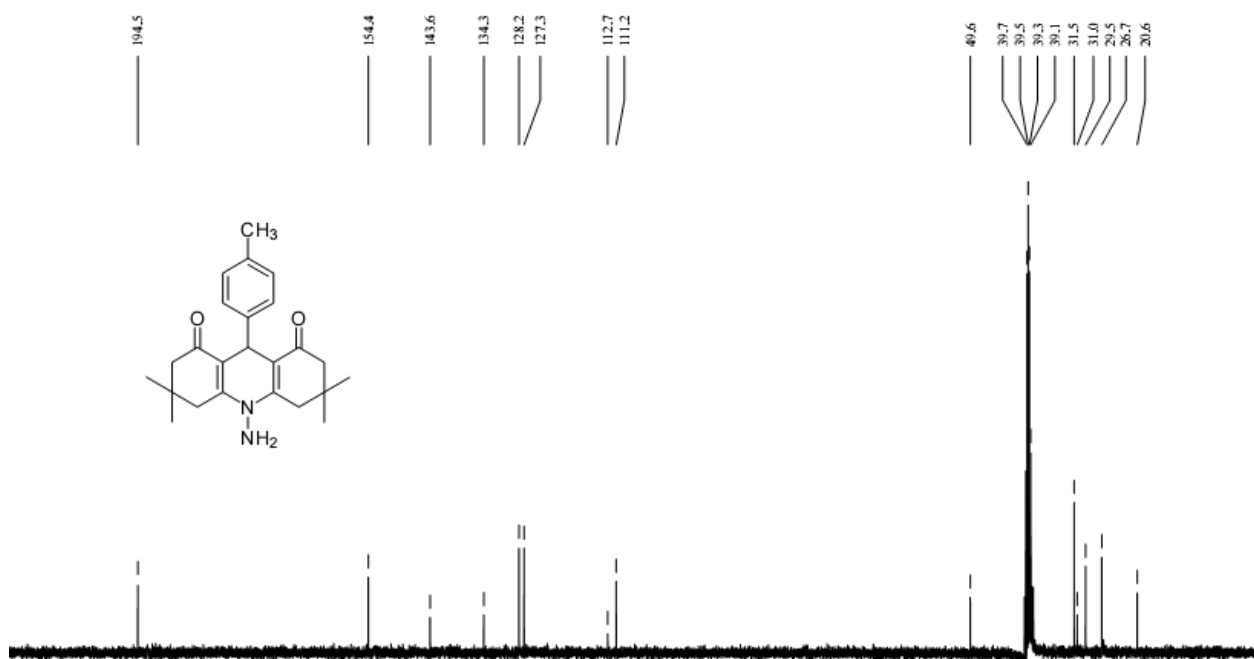

### <sup>13</sup>C NMR Spectrum of Compound 3d

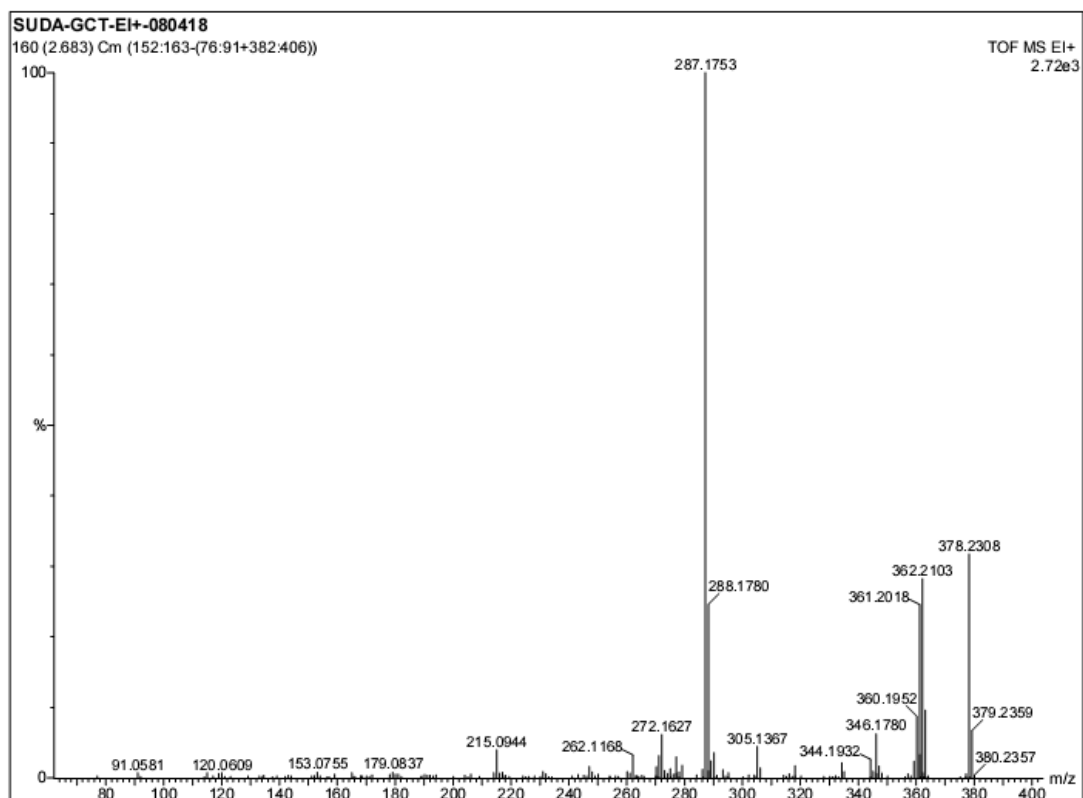

### HRMS Spectrum of Compound 3d
